# Supplementary material
Source: publisher figshare collection journal article supplement (https://rs.figshare.com/ndownloader/files/13481057)
Supplement: Supplementary file 1 [file 13481057]

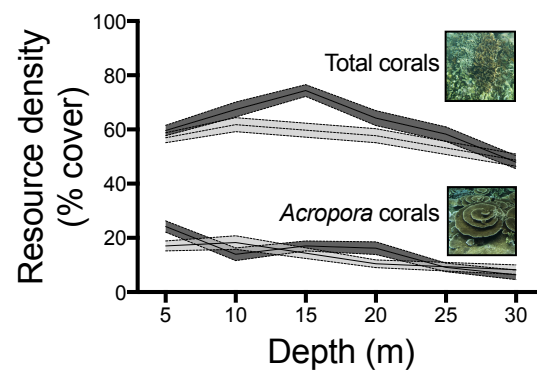

Figure S1: Density of total-coral and *Acropora* coral resources within the focal reef (dark grey), and bay wide (light grey), within Kimbe bay, PNG.
